# Supplementary material for: Lactoferrin Restores the Deoxynivalenol-Impaired Spermatogenesis and Blood–Testis Barrier Integrity via Improving the Antioxidant Capacity and Modifying the Cell Adhesion and Inflammatory Response
Source: MDPI journal article supplement (doi:10.3390/antiox12010152), 2023-01-09
Supplement: s1 [file s1]

Supplementary Table S1 Primers used for real time quantitative PCR

| Gene (abbreviation) | Accession numbers | Sequence (5'→3')                                        | Length of product |
|---------------------|-------------------|---------------------------------------------------------|-------------------|
| Star                | NM_011485.5       | F: ACCTCGGTGCTTTAAGGTGA<br>R: AGCCACAGTGTTTGCTGAAG      | 166               |
| Cyp11a1             | NM_019779.4       | F: GGATGCGTCGATACTCTTCTCA<br>R: GGACGATTCTGGTCTTTCTTCCA | 146               |
| Hsd3β1              | NM_008293.4       | F: GTACATTTATGGGGAGAGAAGTCC<br>R: CCAGGCCACATTGCCTACATA | 130               |
| Cyp17a1             | NM_007809.3       | F: ATCTCTGGGCACTGCATCAC<br>R: GAGCCTCTCCAATGCACGAT      | 156               |
| Tnfrsf9             | NM_001077509.1    | F: TCGCTGCCCTGAGATCGAAA<br>R: TGTTACAGTTCGGCTGTCCA      | 233               |
| Rnf144b             | NM_001170643.1    | F: GCTAGAGAGACGCCAAGCAG<br>R: AGCCTTCTCGGATTGACAGC      | 275               |
| Ccl22               | NM_009137.2       | F: TTGGCCTCCACCTACTCTCA<br>R: CGTGCTGCAGACCAAGAAAC      | 116               |
| Abi1                | NM_001077190.3    | F: CCATGCCTCAGTTGACTCCA<br>R: GTGGAGTTGGGCTATCAGCA      | 145               |
| Itga9               | NM_001113514.1    | F: ATCAAGAGTCACCGCTTCGC<br>R: TGATGCCTTCCTGGTGAGCG      | 90                |
| Pkd1                | NM_013630.3       | F: AGCTACCTGGACCCATCTGT<br>R: CAGCACACCAGGCTTTTAGC      | 122               |
| IL6st               | NM_010560.3       | F: TACCATGGAGCACCTCCCTT<br>R: CACGAAAGAATACGAGCCCA      | 198               |
| Relb                | NM_009046.2       | F: TTCGGGCTGTCGGTCCCTA<br>R: AGGGAAGAGAGGTCACTGGAA      | 104               |
| GAPDH               | NM_008084.4       | F: TGGAGAAACCTGCCAAGTATGA<br>R: TGGAAGAATGGGAGTTGCTGT   | 135               |



transformed, normalized to Vehicle for DON group, and normalized to DON group for DON+LF group). NES—normalized enrichment score;  $q$  value—false discovery rate  $p$  value (same for **supplementary figure S2**).

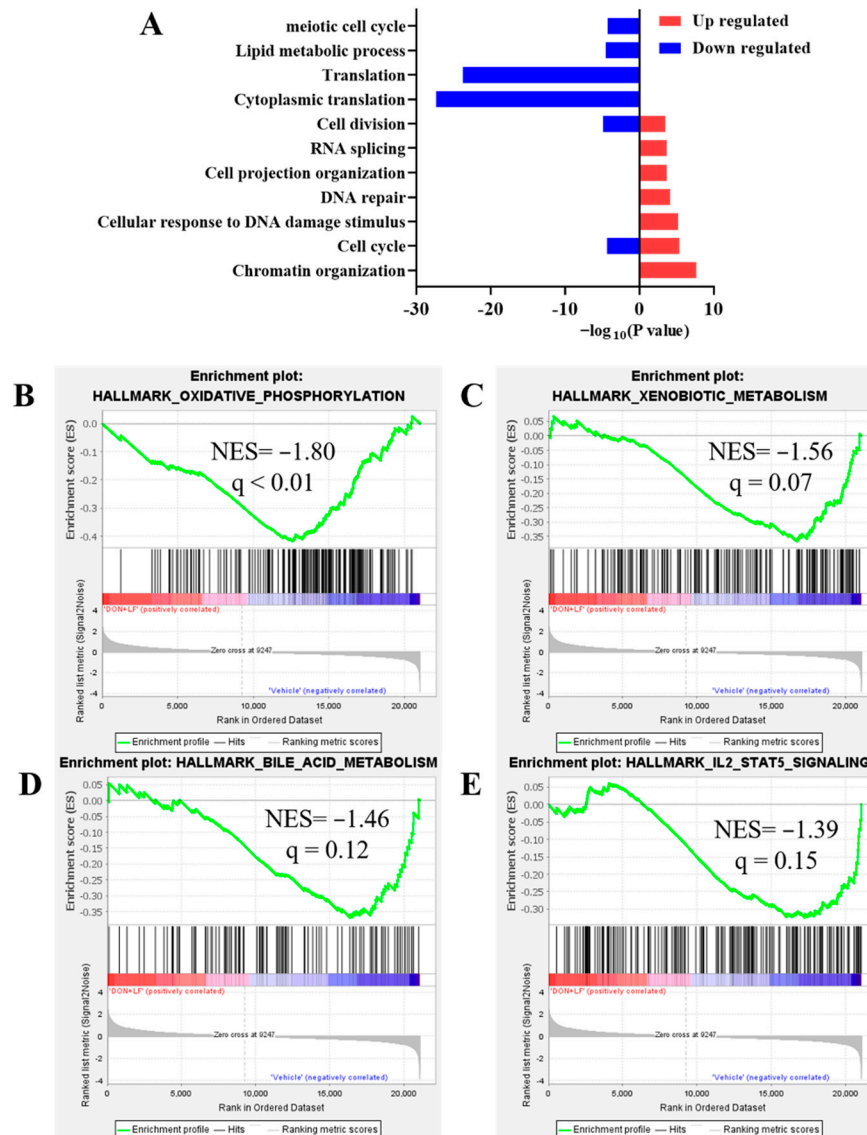

**Supplementary Figure S2.** Transcriptional profiling of testes from mice in DON+LF group compared to the vehicle group. (A) Gene ontology (GO) analysis of the up-regulated and down-regulated genes of the DON+LF group compared to those of the vehicle group. The hypergeometric test and Benjamini–Hochberg  $p$  value correction were applied. (B–E) GSEA plots depicting the enrichment of genes involved in the oxidative phosphorylation, xenobiotic metabolism, bile acid metabolism and IL2 STAT5 signaling pathways of testes in mice of the DON+LF group compared to the vehicles.
